# Supplementary material for: Appraisal of Anchor Arrangement and Size On Sand-Geogrid Interaction In Direct Shear
Source: Research Square preprint supplement (doi:10.21203/rs.3.rs-1104294/v1), 2021-11-30
Supplement: Supplementary file 1 [file 126104f6af81ec8051edf04e.docx]

Table 1. Examples of soil - reinforcement interaction enhancement methods.

| **Researcher(s)** | **Method** | |
| --- | --- | --- |
| Horpibulsuk and Niramitkornburee (2010) | Addition of iron bearing bar to reinforcement | 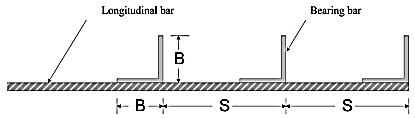 |
| Mosallanezhad et al. (2016) | Rooted geogrid | 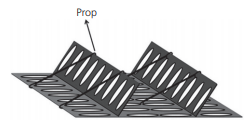 |
| Abdi and Safdari Seh Gonbad  (2018) | Anchored geogrids | 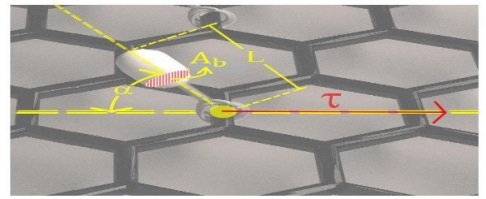 |
| Abdi and Safdari Seh Gonbad  (2019) | Roughened geotextile | 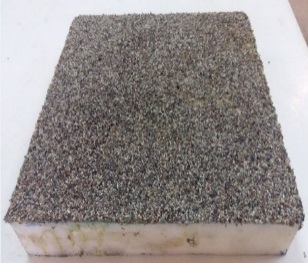 |
| Makkar et al.  (2019) | 3-D geogrid | 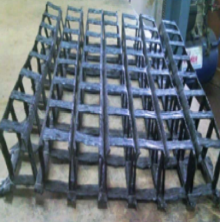 |
